# Supplementary material for: Genome-Wide Methylation Profiles of Primary and Matched Distant Metastasis: Insights from the Dutch Early-Stage Melanoma (D-Esmel) Study
Source: Research Square preprint supplement (doi:10.21203/rs.3.rs-7642695/v1), 2025-10-08
Supplement: Supplementary file 1 [file 6ad1ba96e5e689edeec7a06a.xlsx]

## Sheet: Sheet1
Characteristic	Unmatched samples
	Control (n=9)	Case (n=11)	Metastatis (n=10)
Age (median (IQR))	56 (53-61)	54 (47-62)	54 (49-72)
Sex (n)
Female	3	2	1
Male	6	9	9
Breslow, mm (n)
≤1.0	2	0	0
>1.0-2.0	3	2	4
>2.0-4.0	1	4	3
>4.0	3	5	3
Ulceration (n)
Absent	7	7	7
Present	2	4	3
Stage (n)
1A	2	1	1
1B	3	1	3
2A	1	2	2
2B	2	6	3
2C	1	1	1
Metastatic site collected (n)
Lung	n/a	1	3
Gastro-intestinal	n/a	2	3
Adrenal gland	n/a	1	1
Lymph node	n/a	2	1
Muscle	n/a	1	1
Skin	n/a	2	1
Uncollected	n/a	2	0
Time until distant metastasis, years (n)
< 2 years	n/a	7	4
2-5 years	n/a	3	4
5-8 years	n/a	1	1
>8 years	n/a	0	1
Primary Location (n)
Scalp	0	2	1
Trunk	4	5	4
Lower extremities	2	1	3
Upper extremities	3	3	2
WHO subtype (n)
Superficial Spreading	7	11	10
Nodular	2	0	0
