# Supplementary material for: Genome-Wide Methylation Profiles of Primary and Matched Distant Metastasis: Insights from the Dutch Early-Stage Melanoma (D-Esmel) Study
Source: Research Square preprint supplement (doi:10.21203/rs.3.rs-7642695/v1), 2025-10-08
Supplement: Supplementary file 2 [file e25ba16304e97fee249bbe95.xlsx]

## Sheet: Matched Control-vs-Case
id	site	region	pvalue	Log10(FC)
ENSG00000235115	CHCHD2P8	promotor	1.71e-05	-0.122
ENSG00000281530	DGCR12	promotor	2.16e-05	0.0633
ENSG00000197520	FAM177B	promotor	3.8e-05	-0.196
ENSG00000261140	RP11-20I23.6	genebody	4.37e-05	-0.0478
ENSG00000256268	RP11-221N13.3	promotor	5.93e-05	-0.302
ENSG00000280245	RP11-466A19.4	genebody	6.19e-05	0.431
ENSG00000270906	RP11-475J5.6	genebody	7.18e-05	0.214
ENSG00000264740	AL354923.1	promotor	7.23e-05	0.131
ENSG00000280954	Metazoa_SRP	promotor	0.000118	-0.0385
CpG18312	CpG18312	CpGI	0.000144	-0.358

## Sheet: Matched Case-vs-Metastasis
id	site	region	pvalue	Log10(FC)
ENSG00000279328	RP11-203H19.2	promotor	3.38e-06	-0.0674
ENSG00000228173	AC091770.3	promotor	1.25e-05	-0.404
ENSG00000165795	NDRG2	promotor	3.17e-05	0.365
ENSG00000276831	CTD-2105E13.16	promotor	3.78e-05	0.424
ENSG00000127129	EDN2	promotor	4.62e-05	-0.223
CpG11723	CpG11723	CpGI	6.84e-05	0.22
CpG50048	CpG50048	CpGI	0.000101	0.275
ENSG00000279796	RP11-317F20.3	genebody	0.000102	-0.303
ENSG00000261244	RP11-114H24.7	promotor	0.000105	-0.0873
ENSG00000279250	RP11-46D1.2	promotor	0.000105	-0.373

## Sheet: Unmatched Case-vs-Control
id	site	region	pvalue	Log10(FC)
ENSG00000250626	RP11-756P10.2	genebody	5.59e-06	0.0447
ENSG00000130649	CYP2E1	promotor	2.5e-05	0.857
ENSG00000251619	RP11-756P10.5	genebody	2.93e-05	0.112
CpG32981	CpG32981	CpGI	4.35e-05	0.746
ENSG00000259540	RP11-526I2.1	genebody	8.57e-05	Absent
CpG2229	CpG2229	CpGI	8.59e-05	0.0847
ENSG00000227689	SRP68P2	promotor	0.000103	-0.0735
CpG45288	CpG45288	CpGI	0.000113	-0.111
CpG35692	CpG35692	CpGI	0.000161	0.0838
ENSG00000187624	LIAT	promotor	0.00017	-0.299

## Sheet: Unmatched Case-vs-Metastasis
id	site	region	pvalue	Log10(FC)
ENSG00000238002	NPAP1P6	promotor	3.97e-07	-0.19
ENSG00000237500	RP11-526P5.1	promotor	2.15e-05	-0.69
ENSG00000228173	AC091770.3	promotor	2.7e-05	-1.15
ENSG00000254717	GLYATL1P2	promotor	2.74e-05	Absent
ENSG00000232978	RP11-146N23.4	genebody	2.78e-05	-1.17
ENSG00000270911	CTAGE5 Pseudogene	genebody	3.65e-05	-0.838
ENSG00000228289	RP4-640E24.1	promotor	4.46e-05	-1.01
ENSG00000235659	RP11-374M1.5	genebody	5.47e-05	Absent
ENSG00000250984	CTD-2011G17.1	promotor	5.58e-05	Absent
ENSG00000166401	SERPINB8	promotor	6.25e-05	1.08

## Sheet: Unmatched Primary-vs-Metastatis
id	site	region	pvalue	Log10(FC)
ENSG00000280364	RP3-446N13.2	promotor	2.6e-06	1.14
ENSG00000255110	RP11-72M10.8	promotor	5.42e-06	0.402
ENSG00000232161	FAM27L Pseudogene	promotor	8.95e-06	0.155
CpG33985	CpG33985	CpGI	9.86e-06	-0.94
CpG33272	CpG33272	CpGI	1.04e-05	-0.376
ENSG00000252037	RNU6-162P	promotor	1.39e-05	1.17
ENSG00000212939	RP1-29C18.10	promotor	1.52e-05	0.113
CpG14468	CpG14468	CpGI	1.57e-05	0.122
ENSG00000227015	FAM27 Pseudogene	promotor	1.64e-05	0.147
CpG29748	CpG29748	CpGI	2.09e-05	0.389

## Sheet: Unmatched Lung-vs-Other
id	site	region	pvalue	Log10(FC)
CpG5791	CpG5791	CpGI	3.49e-10	Present
ENSG00000212126	TAS2R50	promotor	5.52e-08	Present
ENSG00000249382	RP11-340A13.1	promotor	4.64e-07	Absent
CpG16107	CpG16107	CpGI	8.36e-07	Present
CpG3744	CpG3744	CpGI	4.1e-06	Present
ENSG00000198728	LDB1	promotor	4.1e-06	Present
ENSG00000200301	RNA5SP483	promotor	4.1e-06	Present
ENSG00000270314	GS1-165B14.2	genebody	4.1e-06	Present
ENSG00000249101	AC008834.2	promotor	4.1e-06	Present
CpG14731	CpG14731	CpGI	4.55e-06	Present

## Sheet: Unmatched GI-vs-Other
id	site	region	pvalue	Log10(FC)
CpG48219	CpG48219	CpGI	4.15e-07	Absent
CpG50140	CpG50140	CpGI	6.19e-07	Absent
CpG13027	CpG13027	CpGI	7.23e-07	Present
ENSG00000164871	SPAG11B	promotor	8.64e-07	Absent
ENSG00000224448	GS1-259H13.7	promotor	3.36e-06	-0.131
ENSG00000204049	RP11-126H7.4	genebody	3.86e-06	Absent
ENSG00000250888	LINC01455	promotor	3.87e-06	-0.371
ENSG00000232264	USP17L24	genebody	4.17e-06	Absent
CpG29806	CpG29806	CpGI	4.32e-06	Absent
CpG49058	CpG49058	CpGI	6.74e-06	Present
